# RESEARCH ARTICLE

# Prediction and discrimination of skeletal muscle function by bioelectrical impedance vector analysis using a standing impedance analyzer in healthy Taiwanese adults

## Authors:

Li-Wen Lee<sup>1</sup>, Hsueh-Kuan Lu<sup>2</sup>, Yu-Yawn Chen<sup>3</sup>, Chung-Liang Lai<sup>4</sup>, Lee-Ping Chu<sup>5</sup>, Meng-Che Hsieh<sup>6</sup>, Kuen-Chang Hsieh<sup>6, 7\*</sup>

## Affiliations:

1 Department of Diagnostic Radiology, Chang Gung Memorial Hospital, Chiayi, Taiwan, 2 General Education Center, National Taiwan University of Sport, Taichung, Taiwan, 3Department of Physical Education, National Taiwan University of Sport, Taichung, Taiwan, 4 Department of Physical Medicine and Rehabilitation, Taichung Hospital, Ministry of Health and Welfare, Taichung, Taiwan, 5 Division of Orthopedics, China Medical University Hospital, Taichung, Taiwan, 6 Research Center, Charder Electronic Co., Ltd, Taichung, Taiwan, 7 Fundamental Education Center, National Chin-Yi University of Technology, Taichung, Taiwan

**Keywords:** ~~handgrip strength, bioelectrical impedance, muscle function~~

**\*Corresponding author:** Kuen-Chang Hsieh. Fundamental Education Center, National Chin-Yi University of Technology, Taichung, Taiwan. Tel: +886-4-24063766 ext 297. E-

mail:abaqus0927@yahoo.com.tw

## Abstract

**Background:** Bioelectrical impedance vector analysis (BIVA) has been used for prediction of muscle performance. However, little is known about BIVA in Asian adults, and even less is known about using standing BIVA devices. Standing impedance analyzer allows quicker and more convenient way to gather data than conventional supine analyzer and is more suitable for clinical practice. This study aimed to investigate the relations between muscle function and BIVA parameters measured with a standing impedance analyzer in healthy Taiwanese adults.

**Methods:** A total of 406 healthy subjects (age  $34.5 \pm 17.3$  years, body mass index  $24.1 \pm 4.1$  kg/m<sup>2</sup>) were recruited for BIVA and handgrip strength (HGS) measurements. Impedance parameters, including resistance (R) and reactance (Xc), were measured and normalized to body size by dividing by height (H). The resulting phase angle (PhA) was calculated. HGS in the dominant, left, and right hands were referred to as HGS<sub>DH</sub>, HGS<sub>LH</sub>, and HGS<sub>RH</sub>, respectively. All subjects were divided into 5 grades according to HGS.

**Results:** Muscle strength in the dominant, right, and left arms was correlated with variables

in the order of sex, weight, age, height, Xc/H, and R/H (all,  $p < 0.001$ ). Using all 6 variables, the determination coefficients were 0.792, 0.782, and 0.745, respectively, whereas the standard errors of estimates were 56.89, 58.01, and 56.67 N for HGS<sub>DH</sub>, HGS<sub>LH</sub>, and HGS<sub>RH</sub>, respectively. HGS was positively correlated with PhA, and negatively correlated with Xc/H and R/H.

**Conclusions:** BIVA parameters measured with a standing impedance analyzer and anthropometric variables can predict and discriminate muscle function with good performance in healthy Asian adults.

## Introduction

Skeletal muscle is the largest organ in human body, and controls physical activity through the generation of force. The health of skeletal muscle is determined by its mass and function, and is regulated by skeletal muscle protein synthesis and breakdown [1]. Imbalance of the dynamic process of skeletal muscle protein metabolism in response to pathologic conditions and chronic disease may affect muscle mass and function [2]. Muscle mass can be indirectly measured by dual-energy X-ray absorptiometry (DXA) and bioelectrical impedance analysis (BIA). Muscle function can be expressed in terms of muscle power, muscle strength, and local muscle endurance [3]. Methods for muscle function evaluation include manual muscle testing, electrophysiological studies, and a handheld dynamometer. Handgrip strength (HGS) measurement using a dynamometer is a relatively inexpensive, portable, and simple method which provides information about overall muscle function [4].

The sex- and age-specific reference curves for HGS are well-established for healthy children and adults [5-7]. These reference curves provide normative values for physical fitness in general populations. Deviation of HGS values from the reference values may indicate disease [8] or the aging process [9, 10]. In general population, a lower HSG is associated with higher risk of mortality and morbidity [11, 12]. A study that included 139,691 subjects (age 35-70 years, median follow-up 4.0 years) from 17 countries showed that a lower HGS was associated with a higher risk for all-cause mortality (hazard ratio [HR] = 1.16, 95%

confidence interval [CI]: 1.13-1.20) and cardiovascular mortality (HR = 1.17, 95% CI: 1.11-1.24) [12]. The UK Biobank Study investigated associations between grip strength and disease incidence and mortality in 502,628 subjects (age 40-69 years, median follow-up 7.1 years) [11]. The study found that a lower HGS was significantly associated with both all-cause mortality (HR per 5 kg lower grip strength = 1.20, 95% CI: 1.17-1.23 in women and 1.16, 1.15-1.17 in men) and cardiovascular mortality (HR per 5 kg lower grip strength = 1.19, 95% CI: 1.13-1.25 in women and 1.22, 1.18-1.26 in men).

Malnutrition is defined as a state resulting from lack of uptake or intake of nutrients. According to global consensus statements [13, 14], HGS is one of the recommended tools for assessing nutritional state [13]. Studies have shown that lower HGS is associated with a longer length of hospital stay [15, 16] and higher mortality rate in critically ill patients [17]. HSG has also been used to monitor the outcome of nutritional intervention [18, 19]. Since muscle function may be altered prior to a change in muscular volume during disease progress or intervention, HSG is a more sensitive indicator to changes in nutritional status compared to body composition analysis [20, 21].

Bioelectrical impedance analysis (BIA) can be used to measure tissue electrical properties such as resistance (R) and reactance (Xc) using alternating current. Body fluids are highly conductive, and the resistance of the conductive fluids is defined as R [22]. Xc is the opposition to current flow due to the capacitive nature of cell membranes. Human cells are

surrounded by phospholipid bilayers and act as an electrical insulator and capacitor.

Therefore,  $X_c$  reflects the integrity of cell membranes, which is correlated with body cell mass [23, 24]. Phase angle (PhA) reflects the relationship of  $R$  and  $X_c$ , and is calculated as  $\text{PhA} = \arctan(X_c/R)$  [25]. Impedance ( $Z$ ) is a function of 2 impedance components,  $R$  and  $X_c$ , and is calculated as  $Z^2 = R^2 + X_c^2$  [23]. If the 2 height-normalized impedance components ( $R/H$  and  $X_c/H$ ) are plotted as a bivariate vector in the  $RX_c$  graph, the length of the vector (Mahalanobis distance) is related to hydration status [24]. Bioelectrical impedance vector analysis (BIVA) is a validated tool for assessing hydration and nutritional status [26]. BIVA has also been validated as a predictor for sports performance [27, 28] and muscular fitness [29].

Currently, BIVA measurements are typically made with subjects in a supine position, and data are acquired at the whole body level. Few studies have examined acquiring BIVA data with subjects standing. Moreover, there is very little published data on muscle function in healthy Asian adults. Consequently, the objective of this study was to investigate the relations between HGS and BIVA in healthy Taiwanese adults using a modified standing impedance analyzer with whole body and segmental modes.

## Materials and methods

This cross-sectional study was approved by the Institutional Review Board of the Jen-Ai

Hospital (No. IRB-97-01). Written informed consent was obtained from all subjects. All experiments were conducted at the Jen-Ai Hospital in the Taichung, Taiwan between January 2016 and May 2017.

## Subjects

Subjects were recruited by community advertisements. Inclusion criteria were healthy Taiwanese adults 18 to 80 years of age. Exclusion criteria were individuals with a pacemaker, metal implants, limb deformities, upper limb neuropathies or arthropathies, those taking medications for chronic conditions and taking vitamin supplements long-term, and those with a history of alcohol abuse and systemic diseases, e.g., malignancy, diabetes, hypertension, hypo- or hyperthyroidism, cardiovascular disease. A total of 406 subjects who met the inclusion criteria and completed each measure were included in the final analysis.

## Study design

All subjects were asked to refrain from alcoholic beverages for at least 48 hours and avoid diuretics for 7 days prior to study. Female subjects were not scheduled during menstruation. On the test day, subjects were registered between 1 pm and 5 pm after fasting for 4 hours and were instructed to void, remove all objects which may affect the exam, and change into a light cotton gown prior to measurements.

## Anthropometric measurements

Height was measured to the nearest 0.1 cm using a mechanical device (Stadiometer, Holtain, Crosswell, Wales, UK), and weight was measured to the nearest 0.1 kg using an electronic scale (BC-418MA, Tanita Corporation, Tokyo, Japan) by skilled operators with subjects not wearing shoes. Technical errors for height and weight measurements were 0.021% and 0.520%, respectively. Body mass index (BMI) was calculated as weight (kg) divided by height squared ( $\text{kg/m}^2$ ).

## Body composition measurements

Body composition measurements were acquired using a DXA scanner (GE, Lunar Prodigy, USA) by experienced radiology technicians. For the examination, subjects were placed supine on the scanning table with the upper limbs stretched and placed flatly on the side of the body, with the feet slightly parallel and the toes facing upwards. The total scan time was approximately 20 min. Regional cut lines were placed using enCore Version 7.0 software according to the manufacturer's protocol. The lean body mass and body fat percentage of the whole body, right arm, and left arm were obtained.

## Handgrip strength

A digital handgrip dynamometer (MG4800, Charder Electronical Co., Ltd., Taichung, Taiwan) was used measure HGS, after subjects were given verbal instructions and a brief demonstration. Subjects were instructed to stand upright with their shoulder adducted and neutrally rotated, elbow fully extended, and forearm and wrist neutrally positioned during the study. When correctly positioned, 3-5 second maximum grip strengths were obtained twice for each hand. No verbal encouragement was given during the test. The average values of the 2 trials in the dominant hand, right hand, and left hand were calculated, and represented as  $HGS_{DH}$ ,  $HGS_{RA}$ , and  $HGS_{LA}$ , respectively.

To ensure the accuracy of the test, all testers were trained in the test procedures and calibration procedures, and instrument calibration data were recorded to ensure reproducibility of the test. All testers practiced the testing procedure in a subgroup of 35 subjects (age  $35.2 \pm 12.3$  years, body weight  $68.3 \pm 10.2$  kg, height  $1.65 \pm 0.1$  m, BMI  $23.9 \pm 3.3$  kg/m<sup>2</sup>) prior to the study assessments. The test-retest reliability intra-class correlation coefficient (ICC) for HGS was  $r = 0.98$  (95% CI: 0.93, 0.99). For criterion-related validity, the MG4800 dynamometer was validated against the standard Jamar dynamometer (J. A. Preston Corporation, Clifton, NJ). The results produced by the 2 devices were highly correlated ( $r = 0.954$  by ICC), and strongly in agreement (bias = 12.0 N, limit of agreement = -58.5 to 85.5 N by Bland-Altman Plot).

## Impedance measurements

BIA measurements were carried out with the subject standing on a modified Quadscan 4000 (Bodystat Ltd, Doubles, Isle of Man, UK) with circuit switching switches and measuring lines [30]. The device was calibrated at the beginning of each day using a 500 ohm test resistor provided by the manufacturer, with R and Xc variations within 1% ( $R = 500 \pm 5$  ohm,  $Xc = 0 \pm 5$  ohm). The reliability and validity of the measuring device have been previously verified [30, 31].

The R, Xc, Z, and PhA for each subject were measured at a single frequency (50 kHz) with 3 modes: whole body (WB), right arm (RA), and the left arm (LA) modes (Figure 1). The method of BIVA used was developed by Professor Antonio Piccoli in 1994 [24]. R and Xc were normalized to height (H), and expressed as R/H and Xc/H, respectively [24]. Then, R/H and Xc/H were used to plot a bivariate RXc graph. The 95% CIs, which represent the mean vector distribution, were calculated for the HGS measurements in the different groups. PhA was defined as  $\arctan(Xc/R)$ .

## Statistical analysis

All statistical analyses were performed using SPSS version 19.0 software (SPSS Inc., Chicago, IL, USA). Data were expressed as mean  $\pm$  standard deviation (SD). The ICC was used to evaluate test-retest reliability. Repeated-measures ANOVA was used to test

differences among group means between men and women. Pearson correlation ( $r$ ) was used to assess the correlation between 2 variables. Stepwise regression analysis was used to fit possible regression models of muscle strength using sex, body weight, age, height,  $X_c/H$ , and  $R/H$  as independent variables ( $F_{in} = 4.00$ ,  $F_{out} = 3.99$ ). Vector plots and analyses were performed using BIVA Software 2002 [32]. Mean vector lengths of groups were tested using the Hotelling's T-squared test in the BIVA Software 2002. A value of  $p < 0.05$  was considered to indicate statistical significance.

## Results

The demographic characteristics of the 406 subjects included in the study are presented in Table 1. Impedance parameters, with and without adjustment for height, are shown for the whole body and segmental levels. Mean age of the subjects was  $34.5 \pm 17.3$  years, and mean BMI was  $24.1 \pm 4.1$  kg/m<sup>2</sup>. Of the 406 subjects, 235 (58%) were men. Anthropometric indices, HSG, and impedance parameters were significantly greater for men compared to women, except for age and BMI. The majority of subjects were right-handed (94.3%). The mean HGS of the dominant hand was  $366.8 \pm 108.0$  N for men and  $251.0 \pm 58.5$  N for women. The correlation coefficients between muscle mass and function in the dominant hand, right arm, and left arm were 0.866, 0.810, and 0.823, respectively (all,  $p < 0.001$ ).

Possible associations between BIVA variables PhA,  $R/H$ , and  $X_c/H$  obtained using

whole body and segmental modes were examined (Table 2). All BIVA variables obtained from whole body and segmental modes were very strongly correlated in both sexes ( $r = 0.910-0.985$ ), except for PhA in males ( $r = 0.852-0.897$ ). The best association was found with R/H ( $r = 0.943-0.985$ ). In general, the correlations between whole body and right arm modes were better than the correlations between whole body and left arm modes for all the BIVA variables.

The results of the multiple regression analyses for HGS using basic indices and height-adjusted BIVA variables (R/H and Xc/H) as predictors are shown in Table 3. The variables were included in the stepwise regression analysis in the following order: sex, weight, age, height, Xc/H, and R/H. Model 1 was the regression model to predict  $HGS_{DH}$  from basic indices and whole body mode BIVA parameters. Model 2 was the regression model to predict  $HGS_{RH}$  based on basic indices and right hand mode BIVA parameters. Model 3 was the regression model to predict  $HGS_{LH}$  from basic indices and left hand mode BIVA parameters. The variance inflation factor (VIF) values were all  $< 10$  (range 1.25-8.26), indicating no multicollinearity. The correlation coefficients between HGS and Xc/H in the whole body, right arm, and left arm modes were 0.663, 0.690, and 0.651, respectively. The correlation coefficients between muscle strength and R/H in whole body, right arm, and left arm modes were 0.773, 0.775 and 0.747, respectively. In general, Xc/H was a better predictor for muscle strength than R/H in all 3 modes.

The subjects were divided into 5 equal groups depending on their HGS level: group I (the highest 20%), and group II, III, IV, and V, with group V representing the lowest 20%.

Graphical comparisons of impedance vectors and confidence ellipses are shown in Figure 2:

HGS<sub>DH</sub> using whole body mode (Figure 2a); HGS<sub>RH</sub> using right arm impedance measuring mode (Figure 2b); HGS<sub>LH</sub> using left arm mode (Figure 2c). A significant displacement of the vector was observed between groups with increasing HGS in all 3 models ( $p = 0.0001-0.0112$  in the whole body model,  $p = 0.0001-0.002$  in the right arm model,  $p = 0.0001-0.0245$  in the left arm model). With increasing level of HGS, a decreasing PhA was also noted in all 3 models (Figure 2).

## Discussion

The results of this study showed that HGS can be predicted by BIVA parameters of the same limb, and the whole body using a modified standing impedance analyzer. Standing BIA analyzers have attracted a growing interest due to their convenience; however, there are concerns about impedance variability due to fluid shift toward the leg during the day [33, 34]. Our study provides evidence that standing BIVA can be used to predict and discriminate muscle function in healthy adults. BIVA references for the healthy Asian adult population are limited because most BIVA studies have been conducted with Caucasian subjects [24, 27, 35-39]. The current study fills this knowledge gap by providing references ranges for the Asian

population.

Compared to body composition analysis, vector analysis uses height-adjusted raw impedance components ( $R/H$  and  $Xc/H$ ), and involves fewer assumptions and is free of regression equations [28]. Therefore, vector analysis should exhibit less error than body composition analysis using an impedance analyzer, making it a more valuable tool.

Volume-adjusted  $R$  and  $Xc$  have also been used to construct specific BIVA plots (specific BIVA) [39, 40]. Whole body mode BIVA, with electrodes placed on the ipsilateral arm and foot is the most common BIVA method. Whole body BIVA is well-known to correlate with many diseases, such as renal diseases, critically ill patients, obesity, sarcopenia, and cachexia [36, 37, 41-43]. Segmental vector analysis is a less common BIVA mode; in which upper limb impedance components are acquired using 2 pairs of electrodes attached to the ipsilateral hand and shoulder, which are then divided by the length of the measured extremity [43, 44]. Alternatively, segmental BIVA components may be measured with electrodes placed on the ipsilateral arm and foot, and voltage electrodes on both hands, as done in our study. With this method, the measured values of  $Xc$  and  $R$  are divided by standing height, which assumes a fixed proportion of limb length to body height.

Maximum handgrip force is mainly determined by the muscle function of the upper limb; therefore, HSG should be associated with BIVA of the ipsilateral limb rather than BIVA of the contralateral limb or the whole body BIVA. Interestingly, whole body  $Xc/H$  and

R/H showed similar performance in predicting HGS compared to segmental Xc/H and R/H of the same limb. This may due to the very strong correlation between whole body and segmental Xc/H and R/H in our healthy subjects. However, our results may not be applicable to individuals with diseases, or the general, non-Asian population. Further research is required to explore the used direct measurement of segmental BIVA for the evaluation of regional muscle function.

In this study, a significant migration of the mean vectors with increasing HGS was observed due to decreased Xc/H and R/H in the healthy adults in this study. A similar finding was reported in a study of healthy young adults by Rodriguez-Rodriguez et al [29]. A study of inpatient subjects showed a different trend for the vector shift; the average vector displaced with increasing HSG due to decreased R/H, but increased Xc/H [25]. Interestingly, our study showed an increase in PhA with increasing HSG in healthy adults using whole body, right limb, and left limb modes, which is consistent with previous studies of healthy young adult [29] and inpatient subjects [25]. Moreover, PhA has been validated as a good predictor of nutritional and functional status [45-47].

In this study, we developed a regression model for HGS using basic indices and BIVA components (Xc/H and R/H). Compared to the regression model for HGS developed using inpatient subjects by Norman et al.[25], the independent variables included in our regression analysis for muscle function were the same, but our models exhibited better

goodness-of-fit ( $r^2 = 0.745-0.792$ ) than theirs ( $r^2 = 0.708$ ). Additionally, the exact order the variables were entered into the equation were different in the 2 studies. In the Norman et al. study, the order was height, age, sex, weight, Xc/H, and R/H; whereas, in our study the order was sex, weight, age, height, Xc/H, and R/H. Although adjusted BIVA components were entered into the models later than the anthropometric indices, correlations between HGS with Xc/H and with R/H were moderate to strong in both studies.

There are limitations of this study that should be considered. First, our study was conducted with healthy Asian adults, and thus the results may not be applicable to different populations or individuals with diseases. Second, migration of the tolerance ellipses in the RXc plots were correlated with group-level differences, and the BIVA method may not be sensitive enough to evaluate vector shifts at the individual level. Third, the segmental BIVA in this study was not measured with electrodes placed on the upper limbs. However, this modified method is more convenient, and yielded good results. Fourth, HGS measured by hand dynamometer may be affected by instrument-, operator- and subject-related errors.

## Conclusions

Our study showed that BIVA parameters measured by a standing impedance analyzer and anthropometric variables can predict muscle function as measured by HGS with good performance in healthy Asian adults. Our results may facilitate clinical applications of

standing BIVA technology in assessing skeletal muscle function.

**Competing Interests:** Two of the authors (KCH) and (MCH) are employed by Charder Electronic Co, Ltd. This company did not provide KCH and MCH financial support in executing this study. Nor did the company have any additional role in the research funding, study design, data collection and analysis, decision to publish, or preparation of the manuscript. There are no patents, products in development nor marketed products to be declared. The other authors declare no conflict of interest.

**Funding:** This work was supported by grant NSC100-2410-H-H-028-MY3 from the National Science Council of Taiwan and grant PG10601- 0241 from Ministry of Health and Welfare of Taiwan.

## **Author contributions**

Conceptualization: LWL HKL YYC CLL KCH.

Formal analysis: LWL KCH.

Funding acquisition: YYC CLL.

Investigation: LWL LPC.

Methodology: LWL MCH.

Project administration: LWL CLL.

Resources: LWL HKL YYC CLL KCH.

Supervision: KCH.

Validation: LWL HKL YYC CLL MCH KCH.

Visualization: LWL LPC KCH.

Writing – original draft: LWL KCH.

Writing – review & editing: LWL HKL YYC CLL KCH.

## References

1. Mitchell WK, Wilkinson DJ, Phillips BE, Lund JN, Smith K, Atherton PJ. Human Skeletal Muscle Protein Metabolism Responses to Amino Acid Nutrition. *Advances in nutrition*. 2016; 7:828S-838S. Epub 2016/07/11. doi: [10.3945/an.115.011650](https://doi.org/10.3945/an.115.011650) PMID: [27422520](https://pubmed.ncbi.nlm.nih.gov/27422520/)
2. Wolfe RR. The underappreciated role of muscle in health and disease. *The American journal of clinical nutrition*. 2006; 84:475-482. Epub 2006/12/01. doi: [10.1093/ajcn/84.3.475](https://doi.org/10.1093/ajcn/84.3.475) PMID: [16960159](https://pubmed.ncbi.nlm.nih.gov/16960159/)
3. Ramirez-Velez R, Meneses-Echavez JF, Gonzalez-Ruiz K, Correa JE. [Muscular fitness and cardiometabolic risk factors among Colombian young adults]. *Nutricion hospitalaria*. 2014;30:769-775. Epub 2014/10/01. doi: [10.3305/nh.2014.30.4.7684](https://doi.org/10.3305/nh.2014.30.4.7684) PMID: [25335660](https://pubmed.ncbi.nlm.nih.gov/25335660/)
4. Dodds RM, Syddall HE, Cooper R, Kuh D, Cooper C, Sayer AA. Global variation in grip strength: a systematic review and meta-analysis of normative data. *Age ageing*

- 2016;45:209-216. Epub 2016/01/19. doi: [10.1093/ageing/afv192](https://doi.org/10.1093/ageing/afv192) PMID: [PMC4776623](https://pubmed.ncbi.nlm.nih.gov/27741055/)
5. Laurson KR, Saint-Maurice PF, Welk GJ, Eisenmann JC. Reference Curves for Field Tests of Musculoskeletal Fitness in U.S. Children and Adolescents: The 2012 NHANES National Youth Fitness Survey. Journal of strength and conditioning research. 2017;31:2075-2082. Epub 2017/08/31. doi: [10.1519/JSC.0000000000001678](https://doi.org/10.1519/JSC.0000000000001678) PMID: [27741055](https://pubmed.ncbi.nlm.nih.gov/27741055/)
6. Leong DP, Teo KK, Rangarajan S, Kutty VR, Lanas F, Hui C, et al. Reference ranges of handgrip strength from 125,462 healthy adults in 21 countries: a prospective urban rural epidemiologic (PURE) study. Journal of cachexia, sarcopenia and muscle. 2016;7:535-546. Epub 2016/04/12. doi: [10.1002/jcsm.12112](https://doi.org/10.1002/jcsm.12112) PMID: [PMC4833755](https://pubmed.ncbi.nlm.nih.gov/27741055/)
7. De Miguel-Etayo P, Gracia-Marco L, Ortega FB, Intemann T, Foraita R, Lissner L, et al. Physical fitness reference standards in European children: the IDEFICS study. International journal of obesity. (Lond) 2014;38:S57-66. Epub 2014/09/01. doi: [10.1038/ijo.2014.136](https://doi.org/10.1038/ijo.2014.136) PMID: [25376221](https://pubmed.ncbi.nlm.nih.gov/25376221/)
8. Norman K, Stobäus N, Kulka K, Schulzke J. Effect of inflammation on handgrip strength in the non-critically ill is independent from age, gender and body composition. European journal of clinical nutrition. 2014;68:155-158. Epub 2013/12/11. doi: [10.1038/ejcn.2013.261](https://doi.org/10.1038/ejcn.2013.261) PMID: [24327120](https://pubmed.ncbi.nlm.nih.gov/24327120/)
9. Cruz-Jentoft AJ, Baeyens JP, Bauer JM, Boirie Y, Cederholm T, Landi F, et al.

- Sarcopenia: European consensus on definition and diagnosis: Report of the European Working Group on Sarcopenia in Older People. *Age ageing* 2010;39(4):412-423. Epub 2010/04/13. doi: [10.1093/ageing/afq034](https://doi.org/10.1093/ageing/afq034) PMID: [PMC2886201](https://pubmed.ncbi.nlm.nih.gov/2886201/)
10. Distefano G, Goodpaster BH. Effects of Exercise and Aging on Skeletal Muscle. *Cold spring harbor perspectives in medicine*. 2018;8(3). Epub 2018/03/01. doi: [10.1101/cshperspect.a029785](https://doi.org/10.1101/cshperspect.a029785) PMID: [PMC5830901](https://pubmed.ncbi.nlm.nih.gov/35830901/)
  11. Celis-Morales CA, Welsh P, Lyall DM, Steell L, Petermann F, Anderson J, et al. Associations of grip strength with cardiovascular, respiratory, and cancer outcomes and all cause mortality: prospective cohort study of half a million UK Biobank participants. *British medical journal*. 2018;361:k1651. Epub 2018/05/01. doi: [10.1136/bmj.k1651](https://doi.org/10.1136/bmj.k1651) PMID: [PMC5939721](https://pubmed.ncbi.nlm.nih.gov/35939721/)
  12. Leong DP, Teo KK, Rangarajan S, Lopez-Jaramillo P, Avezum A Jr, Orlandini A, et al. Prognostic value of grip strength: findings from the Prospective Urban Rural Epidemiology (PURE) study. *Lancet*. 2015;386:266-273. Epub 2015/05/13. doi: [10.1016/S0140-6736\(14\)62000-6](https://doi.org/10.1016/S0140-6736(14)62000-6) PMID: [25982160](https://pubmed.ncbi.nlm.nih.gov/25982160/)
  13. Soeters PB, Reijven PL, van Bokhorst-de van der Schueren MA, Schols JM, Halfens RJ, Meijers JM, et al. A rational approach to nutritional assessment. *Clinical nutrition*. 2008;27:706-716. Epub 2008/09/09. doi: [10.1016/j.clnu.2008.07.009](https://doi.org/10.1016/j.clnu.2008.07.009) PMID: [18783855](https://pubmed.ncbi.nlm.nih.gov/18783855/)
  14. White JV, Guenter P, Jensen G, Malone A, Schofield M. Consensus statement of the

Academy of Nutrition and Dietetics/American Society for Parenteral and Enteral

Nutrition: characteristics recommended for the identification and documentation of adult

malnutrition (undernutrition). The journal of the academy of nutrition and dietetics.

2012;112:730-738. Epub 2012/04/25. doi: [10.1016/j.jand.2012.03.012](https://doi.org/10.1016/j.jand.2012.03.012) PMID: [22709779](https://pubmed.ncbi.nlm.nih.gov/22709779/)

15. Mendes J, Azevedo A, Amaral TF. Handgrip strength at admission and time to discharge in medical and surgical inpatients. The journal of parenteral and enteral nutrition.

2014;38:481-488. Epub 2013/04/22. doi: [10.1177/0148607113486007](https://doi.org/10.1177/0148607113486007) PMID: [23609772](https://pubmed.ncbi.nlm.nih.gov/23609772/)

16. Roberts HC, Syddall HE, Cooper C, Aihie Sayer A. Is grip strength associated with length of stay in hospitalised older patients admitted for rehabilitation? Findings from the Southampton grip strength study. Age ageing 2012;41:641-646. Epub 2012/07/09.

doi: [10.1093/ageing/afs089](https://doi.org/10.1093/ageing/afs089) PMID: [22777206](https://pubmed.ncbi.nlm.nih.gov/22777206/)

17. Ali NA, O'Brien JM, Jr., Hoffmann SP, Phillips G, Garland A, Finley JC, et al. Acquired weakness, handgrip strength, and mortality in critically ill patients. American journal of respiratory and critical care medicine. 2008;178:261-268. Epub 2008/05/29. doi:

[10.1164/rccm.200712-1829OC](https://doi.org/10.1164/rccm.200712-1829OC) PMID: [18511703](https://pubmed.ncbi.nlm.nih.gov/18511703/)

18. Christie PM, Hill GL. Effect of intravenous nutrition on nutrition and function in acute attacks of inflammatory bowel disease. Gastroenterology. 1990;99:730-736. Epub

1990/09/01. doi: [10.1016/0016-5085\(90\)90962-Z](https://doi.org/10.1016/0016-5085(90)90962-Z) PMID: [2116343](https://pubmed.ncbi.nlm.nih.gov/2116343/)

19. Keele AM, Bray MJ, Emery PW, Duncan HD, Silk DB. Two phase randomised

controlled clinical trial of postoperative oral dietary supplements in surgical patients.

Gut. 1997;40:393-399. Epub 1997/03/01. doi: [10.1136/gut.40.3.393](https://doi.org/10.1136/gut.40.3.393) PMID:

[PMC1027092](https://pubmed.ncbi.nlm.nih.gov/1027092/)

20. Peng S, Plank LD, McCall JL, Gillanders LK, McIlroy K, Gane EJ. Body composition, muscle function, and energy expenditure in patients with liver cirrhosis: a

comprehensive study. The American journal of clinical nutrition. 2007;85:1257-1266.

Epub 2007/05/01. doi: [10.1093/ajcn/85.5.1257](https://doi.org/10.1093/ajcn/85.5.1257) PMID: [17490961](https://pubmed.ncbi.nlm.nih.gov/17490961/)

21. Norman K, Stobaus N, Gonzalez MC, Schulzke JD, Pirlich M. Hand grip strength:

outcome predictor and marker of nutritional status. Clinical nutrition. 2011;30:135-142.

Epub 2010/10/30. doi: [10.1016/j.clnu.2010.09.010](https://doi.org/10.1016/j.clnu.2010.09.010) PMID: [21035927](https://pubmed.ncbi.nlm.nih.gov/21035927/)

22. Kyle UG, Bosaeus I, De Lorenzo AD, Deurenberg P, Elia M, Gómez JM, et al.

Bioelectrical impedance analysis--part I: review of principles and methods. Clinical

nutrition. 2004;23:1226-1243. Epub 2004/10/01. doi: [10.1016/j.clnu.2004.06.004](https://doi.org/10.1016/j.clnu.2004.06.004) PMID:

[15380917](https://pubmed.ncbi.nlm.nih.gov/15380917/)

23. Kushner RF. Bioelectrical impedance analysis: a review of principles and applications.

Journal of the American college of nutrition. 1992;11:199-209. Epub 1992/04/01. PMID:

[1578098](https://pubmed.ncbi.nlm.nih.gov/1578098/)

24. Piccoli A, Rossi B, Pillon L, Bucciante G. A new method for monitoring body fluid

variation by bioimpedance analysis: the RXc graph. Kidney international. 1994;46:534-

539. Epub 1994/08/01. doi: [10.1038/ki.1994.305](https://doi.org/10.1038/ki.1994.305) PMID: [7967368](https://pubmed.ncbi.nlm.nih.gov/7967368/)
25. Norman K, Pirlich M, Sorensen J, Christensen P, Kemps M, Schütz T, et al.  
  
Bioimpedance vector analysis as a measure of muscle function. Clinical nutrition.  
  
2009;28:78-82. Epub 2008/12/06. doi: [10.1016/j.clnu.2008.11.001](https://doi.org/10.1016/j.clnu.2008.11.001) PMID: [19064305](https://pubmed.ncbi.nlm.nih.gov/19064305/)
26. Norman K, Stobaus N, Pirlich M, Bosy-Westphal A. Bioelectrical phase angle and  
  
impedance vector analysis--clinical relevance and applicability of impedance parameters.  
  
Clinical nutrition. 2012;31:854-861. Epub 2012/07/12. doi: [10.1016/j.clnu.2012.05.008](https://doi.org/10.1016/j.clnu.2012.05.008)  
  
PMID: [22698802](https://pubmed.ncbi.nlm.nih.gov/22698802/)
27. Micheli ML, Pagani L, Marella M, Gulisano M, Piccoli A, Angelini F, et al.  
  
Bioimpedance and impedance vector patterns as predictors of league level in male  
  
soccer players. International journal of sports physiology and performance. 2014;9:532-  
  
539. Epub 2013/07/22. doi: [10.1123/ijsp.2013-0119](https://doi.org/10.1123/ijsp.2013-0119) PMID: [23881291](https://pubmed.ncbi.nlm.nih.gov/23881291/)
28. Castizo-Olier J, Iruiria A, Jemni M, Carrasco-Marginet M, Fernandez-Garcia R,  
  
Rodriguez FA. Bioelectrical impedance vector analysis (BIVA) in sport and exercise:  
  
Systematic review and future perspectives. PLoS one 2018;13:e0197957. Epub  
  
2018/06/01. doi: [10.1371/journal.pone.0197957](https://doi.org/10.1371/journal.pone.0197957) PMID: [PMC5991700](https://pubmed.ncbi.nlm.nih.gov/3005991700/)
29. Rodriguez-Rodriguez F, Cristi-Montero C, Gonzalez-Ruiz K, Correa-Bautista JE,  
  
Ramirez-Velez R. Bioelectrical Impedance Vector Analysis and Muscular Fitness in  
  
Healthy Men. Nutrients. 2016;8(7). Epub 2016/07/01. doi: [10.3390/nu8070407](https://doi.org/10.3390/nu8070407) PMID:

[PMC4963883](#)

30. Wu CS, Chen YY, Chuang CL, Chiang LM, Dwyer GB, Hsu YL, et al. Predicting body composition using foot-to-foot bioelectrical impedance analysis in healthy Asian individuals. *Nutrition journal*. 2015;14:52. Epub 2015/05/01. doi: [10.1186/s12937-015-0041-0](#) PMID: [PMC4489024](#)
31. Sun G, French CR, Martin GR, Younghusband B, Green RC, Xie YG, et al. Comparison of multifrequency bioelectrical impedance analysis with dual-energy X-ray absorptiometry for assessment of percentage body fat in a large, healthy population. *The American journal of clinical nutrition*. 2005;81:74-78. Epub 2005/01/01. doi: [10.1093/ajcn/81.1.74](#) PMID: [15640463](#)
32. Piccoli A, Pastori G. BIVA software. Padova, Italy: University of Padova. Dept. of Medical and Surgical Sciences; 2002.
33. Maw GJ, Mackenzie IL, Taylor NA. Redistribution of body fluids during postural manipulations. *Acta physiologica Scandinavica*. 1995;155:157-163. Epub 1995/10/01. doi: [10.1111/j.1748-1716.1995.tb09960.x](#) PMID: [8669288](#)
34. Oshima Y, Shiga T. Within-day variability of whole-body and segmental bioelectrical impedance in a standing position. *European journal of clinical nutrition*. 2006;60:938-941. Epub 2006/02/15. doi: [10.1038/sj.ejcn.1602402](#) PMID: [16482076](#)
35. Piccoli A, Pillon L, Dumler F. Impedance vector distribution by sex, race, body mass

index, and age in the United States: standard reference intervals as bivariate Z scores.

Nutrition. 2002;18:153-167. Epub 2002/02/01. doi: [10.1016/S0899-9007\(01\)00665-7](https://doi.org/10.1016/S0899-9007(01)00665-7)

PMID: [11844647](https://pubmed.ncbi.nlm.nih.gov/11844647/)

36. Piccoli A. Bioelectric impedance vector distribution in peritoneal dialysis patients with different hydration status. Kidney international. 2004;65:1050-1063. Epub 2004/03/01.

doi: [10.1111/j.1523-1755.2004.00467.x](https://doi.org/10.1111/j.1523-1755.2004.00467.x) PMID: [16790722](https://pubmed.ncbi.nlm.nih.gov/16790722/)

37. Castillo ML, Colin RE, Orea TA, Asensio LE, Bernal RLP, Rebollar GV, et al.

Bioelectrical impedance and strength measurements in patients with heart failure:

comparison with functional class. Nutrition. 2007;23:412-418. Epub 2007/05/01. doi:

[10.1016/j.nut.2007.02.005](https://doi.org/10.1016/j.nut.2007.02.005) PMID: [17483008](https://pubmed.ncbi.nlm.nih.gov/17483008/)

38. Koury JC, Trugo NM, Torres AG. Phase angle and bioelectrical impedance vectors in adolescent and adult male athletes. International journal of sports physiology and

performance. 2014;9:798-804. Epub 2004/01/10. doi: [10.1123/ijsspp.2013-0397](https://doi.org/10.1123/ijsspp.2013-0397) PMID:

[24414089](https://pubmed.ncbi.nlm.nih.gov/24414089/)

39. Saragat B, Buffa R, Mereu E, Ee Rui M, Coin A, Sergi G, Marini E. Specific

bioelectrical impedance vector reference values for assessing body composition in the

Italian elderly. Experimental gerontology. 2014;50:52-56. Epub 2013/12/03. doi:

[10.1016/j.exger.2013.11.016](https://doi.org/10.1016/j.exger.2013.11.016) PMID: [24316033](https://pubmed.ncbi.nlm.nih.gov/24316033/)

40. Buffa R, Saragat B, Cabras S, Rinaldi AC, Marini E. Accuracy of specific BIVA for the

assessment of body composition in the United States population. PLoS one.

2013;8:e58533. Epub 2013/03/06. doi: [10.1371/journal.pone.0058533](https://doi.org/10.1371/journal.pone.0058533) PMID:

[PMC3590169](https://pubmed.ncbi.nlm.nih.gov/2318964/)

41. Baldwin CE, Paratz JD, Bersten AD. Body composition analysis in critically ill survivors: a comparison of bioelectrical impedance spectroscopy devices. The journal of parenteral and enteral nutrition. 2012;36:306-315. Epub 2012/02/07. doi:

[10.1177/0148607111433055](https://doi.org/10.1177/0148607111433055) PMID: [22318964](https://pubmed.ncbi.nlm.nih.gov/22318964/)

42. Castillo-Martinez L, Colin-Ramirez E, Orea-Tejeda A, González IDG, Rodríguez GWD, Santillán DC, et al. Cachexia assessed by bioimpedance vector analysis as a prognostic indicator in chronic stable heart failure patients. Nutrition. 2012;28:886-891. Epub

2012/04/04. doi: [10.1016/j.nut.2011.11.024](https://doi.org/10.1016/j.nut.2011.11.024) PMID: [22480798](https://pubmed.ncbi.nlm.nih.gov/22480798/)

43. Chumlea WC, Baumgartner RN, Roche AF. Specific resistivity used to estimate fat-free mass from segmental body measures of bioelectric impedance. The American journal of clinical nutrition. 1988;48:7-15. Epub 1988/07/01. doi: [10.1093/ajcn/48.1.7](https://doi.org/10.1093/ajcn/48.1.7) PMID:

[3389332](https://pubmed.ncbi.nlm.nih.gov/3389332/)

44. Mereu E, Succa V, Buffa R, Sanna C, Mereu RM, Catta O, Marini E. Total body and arm bioimpedance in patients with Alzheimer's disease. Experimental gerontology.

2018;102:145-148. Epub 2017/11/22. doi: [10.1016/j.exger.2017.11.011](https://doi.org/10.1016/j.exger.2017.11.011) PMID:

[29175393](https://pubmed.ncbi.nlm.nih.gov/29175393/)

45. Chertow GM, Jacobs DO, Lazarus JM, Lew NL, Lowrie EG. Phase angle predicts survival in hemodialysis patients. *Journal of renal nutrition*. 1997;7:204-207. Epub 1997/10/01. doi: [10.1016/S1051-2276\(97\)90020-0](https://doi.org/10.1016/S1051-2276(97)90020-0)
46. Wirth R, Volkert D, Rosler A, Sieber CC, Bauer JM. Bioelectric impedance phase angle is associated with hospital mortality of geriatric patients. *Archives of gerontology and geriatrics*. 2010;51:290-294. Epub 2009/10/30. doi: [10.1016/j.archger.2009.12.002](https://doi.org/10.1016/j.archger.2009.12.002) PMID: [20044156](https://pubmed.ncbi.nlm.nih.gov/20044156/)
47. McGregor RA, Cameron-Smith D, Poppitt SD. It is not just muscle mass: a review of muscle quality, composition and metabolism during ageing as determinants of muscle function and mobility in later life. *Longev & healthspan*. 2014;3:2046-2395. Epub 2014/12/01. doi: [10.1186/2046-2395-3-9](https://doi.org/10.1186/2046-2395-3-9) PMID: [25520782](https://pubmed.ncbi.nlm.nih.gov/25520782/)

## Figure legends

Figure 1. Resistance and reactance measurement modes for the respective body segments. (a)

Whole body model; (b) Right arm model; (c) Left arm model.

Figure 2. Significant average vector displacement of the handgrip strength (HGS) quintile

groups. (a) Habitual HGS and whole body impedance measurement mode. (b) Right hand

HGS and right upper limb impedance measurement mode. (c) Left hand HGS and left upper

limb impedance measurement mode.

Inserted table: HGS: hand grip strength presented as mean  $\pm$  standard deviation, n (male /

female) in the hand grip strength quintile groups: I (the highest quintile), II, III, IV, V (the

lowest quintile)  $D$  = Mahalanobis distance between 2 groups defined by the 2 correlated

variables.  $T^2$  = Hotelling's T-squared test.

**Table 1. Subject demographic and body composition characteristics**

|                             | Total (N = 406)           | Female (n = 171)          | Male (n = 235)              |
|-----------------------------|---------------------------|---------------------------|-----------------------------|
| Age (year)                  | 34.5±17.3 (18.7, 79.0)    | 36.9±18.7 (18.8, 79.8)    | 32.8±15.4 (18.7, 79.8)      |
| H (m)                       | 1.68±0.10 (1.45, 1.97)    | 1.61±0.06 (1.46, 1.74)    | 1.74±0.08 (152, 197)**      |
| Weight (kg)                 | 67.9±14.1 (42.0, 120.0)   | 60.8±11.9 (42.0, 106.0)   | 75.3±12.2 (45.0, 120.0)**   |
| BMI (kg/m <sup>2</sup> )    | 24.1±4.1 (16.2, 39.9)     | 23.5±4.6 (16.2, 38.0)     | 24.6±3.6 (16.3, 39.9)       |
| HGS <sub>DH</sub> (N)       | 366.8±108.0 (86.3, 601.7) | 251.0±58.5 (127.5, 402.5) | 482.7±82.8 (188.7, 721.0)** |
| HGS <sub>RH</sub> (N)       | 363.5±108.2 (86.3, 601.7) | 249.5±58.5 (127.5, 388.2) | 482.7±82.8 (188.7, 721.0)** |
| HGS <sub>LH</sub> (N)       | 337.8±99.1 (78.2, 552.3)  | 231.4±59.3 (112.2, 402.5) | 437.7±77.7 (178.9, 638.6)** |
| Z <sub>WB</sub> (ohm)       | 559.6±99.4 (376.7, 908.6) | 650.0±96.0 (476.7, 908.6) | 514.0±63.7 (376.7, 671.7)** |
| Z <sub>RA</sub> (ohm)       | 312.5±68.0 (203.5, 509.4) | 379.4±61.8 (263.6, 509.4) | 278.8±40.9 (203.5, 389.9)** |
| Z <sub>LA</sub> (ohm)       | 319.4±70.7 (194.9, 522.3) | 386.8±64.7 (268.2, 522.2) | 285.5±44.6 (194.9, 423.7)** |
| R <sub>WB</sub>             | 556.5±99.4 (374.6, 905.8) | 647.8±96.0 (474.2, 905.8) | 510.7±63.4 (374.6, 668.1)** |
| R <sub>RA</sub>             | 311.0±68.1 (202.5, 508.0) | 378.1±61.8 (262.5, 508.0) | 277.3±40.7 (202.5, 388.4)** |
| R <sub>LA</sub>             | 318.0±70.7 (193.9, 520.9) | 385.5±64.8 (267.1, 520.9) | 284.0±44.5 (193.9, 422.2)** |
| Xc <sub>WB</sub>            | 58.1±7.7 (40.1, 79.6)     | 58.4±7.2 (44.9, 79.6)     | 57.9±8.0 (40.1, 78.9)**     |
| Xc <sub>RA</sub>            | 30.1±4.3 (19.9, 40.2)     | 31.7±3.9 (23.4, 40.0)     | 29.3±4.3 (19.9, 40.2)**     |
| Xc <sub>LA</sub>            | 29.9±4.2 (19.4, 41.2)     | 31.0±3.9 (23.0, 40.3)     | 29.3±4.2 (19.4, 41.2)**     |
| R <sub>WB</sub> /H (ohm/m)  | 332.1±68.2 (214.6, 595.9) | 401.9±62.9 (283.3, 595.9) | 297.1±36.7 (214.6, 370.7)** |
| R <sub>RA</sub> /H (ohm/m)  | 185.8±45.8 (116.1, 334.2) | 236.4±39.9 (158.1, 334.2) | 161.3±23.6 (116.1, 218.2)** |
| R <sub>LA</sub> /H (ohm/m)  | 189.9±47.2 (111.1, 342.7) | 239.1±41.6 (160.9, 342.7) | 165.2±25.6 (111.1, 237.2)** |
| Xc <sub>WB</sub> /H (ohm/m) | 34.6±5.0 (22.5, 48.2)     | 36.3±4.9 (26.4, 48.2)     | 33.7±4.8 (22.5, 46.5)**     |
| Xc <sub>RA</sub> /H (ohm/m) | 18.0±2.9 (11.1, 25.1)     | 19.7±2.7 (13.8, 25.1)     | 17.1±2.6 (11.1, 24.5)**     |
| Xc <sub>LA</sub> /H (ohm/m) | 17.8±2.8 (11.1, 25.1)     | 19.2±2.7 (14.1, 24.4)     | 17.0±2.5 (11.1, 25.1)**     |
| PhA <sub>WB</sub> (°)       | 6.0±0.8 (3.5, 7.2)        | 5.2±0.6 (3.9, 6.4)        | 6.2±0.5 (4.9, 7.2)**        |
| PhA <sub>RA</sub> (°)       | 5.5±0.9 (4.1, 8.6)        | 4.8±0.6 (3.5, 6.1)        | 6.0±0.7 (4.5, 8.2)**        |
| PhA <sub>LA</sub> (°)       | 5.4±0.9 (3.8, 8.2)        | 4.6±0.7 (3.5, 6.1)        | 5.9±0.7 (4.9, 8.6)**        |
| Lean <sub>WB</sub> (kg)     | 48.0±11.6 (24.7, 82.3)    | 37.2±4.7 (24.7, 53.4)     | 55.8±8.0 (33.4, 82.2)**     |
| Lean <sub>RA</sub> (kg)     | 2.7±0.9 (1.1, 5.2)        | 1.8±0.4 (1.1, 3.2)        | 3.3±0.6 (1.6, 5.1)**        |
| Lean <sub>LA</sub> (kg)     | 2.6±0.9 (1.1, 4.9)        | 1.8±0.5 (1.1, 3.4)        | 3.2±0.6 (1.7, 4.9)**        |
| BF% (%)                     | 25.3±11.4 (5.1, 54.3)     | 33.1±9.4 (10.4, 54.3)     | 19.6±9.2 (5.1, 40.4)**      |

Data given as mean ± standard deviation (min, max).; H, height; HGS, hand grip strength; PhA, phase angle; BF%, percentage body fat; R, resistance; Xc, reactance; Lean, lean body mass; R/H, resistance standardized for height; Xc/H, reactance standardized for height; WC, waist circumference.; Subscript R, L, RA, LA, WB, D = right, left, right arm, left arm, whole body, dominant hand respectively.

**Table 2. Regression analysis of impedance parameters using whole body and segmental modes**

|                     | Dependent Variable  | Independent Variable | Intercept       | Coefficient   | r <sup>2</sup> | SEE    |
|---------------------|---------------------|----------------------|-----------------|---------------|----------------|--------|
| Total<br>( n = 406) | Ph <sub>WB</sub>    | PhA <sub>RA</sub>    | 0.686±0.127**   | 0.939±0.022** | 0.960          | 0.240  |
|                     |                     | PhA <sub>LA</sub>    | 1.217±0.142**   | 0.871±0.025** | 0.941          | 0.290  |
|                     | R <sub>WB</sub> /H  | R <sub>RA</sub> /H   | 64.055±3.784**  | 1.447±0.020** | 0.985          | 11.885 |
|                     |                     | R <sub>LA</sub> /H   | 66.924±4.291**  | 1.400±0.022** | 0.981          | 13.560 |
|                     | Xc <sub>WB</sub> /H | Xc <sub>RA</sub> /H  | 5.434±0.923**   | 1.623±0.051** | 0.962          | 0.755  |
|                     |                     | Xc <sub>LA</sub> /H  | 1.098±1.001**   | 0.929±0.056** | 0.931          | 1.829  |
| Female<br>(n = 171) | Ph <sub>WB</sub>    | PhA <sub>RA</sub>    | 0.744±0.228**   | 0.915±0.047** | 0.939          | 0.210  |
|                     |                     | PhA <sub>LA</sub>    | 1.557±0.219**   | 0.777±0.046** | 0.920          | 0.241  |
|                     | R <sub>WB</sub> /H  | R <sub>RA</sub> /H   | 40.748±11.247** | 1.539±0.047** | 0.976          | 13.481 |
|                     |                     | R <sub>LA</sub> /H   | 50.328±12.174** | 1.469±0.050** | 0.971          | 14.901 |
|                     | Xc <sub>WB</sub> /H | Xc <sub>RA</sub> /H  | 2.154±1.859*    | 1.734±0.094** | 0.933          | 1.779  |
|                     |                     | Xc <sub>LA</sub> /H  | 3.714±2.099*    | 1.693±0.108** | 0.910          | 2.051  |
| Male<br>(n = 235)   | Ph <sub>WB</sub>    | PhA <sub>RA</sub>    | 1.339±0.252**   | 0.838±0.040** | 0.897          | 0.243  |
|                     |                     | PhA <sub>LA</sub>    | 1.992±0.276**   | 0.751±0.045** | 0.852          | 0.288  |
|                     | R <sub>WB</sub> /H  | R <sub>RA</sub> /H   | 65.642±6.662**  | 1.443±0.042** | 0.959          | 10.731 |
|                     |                     | R <sub>LA</sub> /H   | 79.702±7.506**  | 1.322±0.046** | 0.943          | 12.650 |
|                     | Xc <sub>WB</sub> /H | Xc <sub>RA</sub> /H  | 3.243±1.006**   | 1.784±0.058** | 0.948          | 1.537  |
|                     |                     | Xc <sub>LA</sub> /H  | 3.443±1.166**   | 1.776±0.068** | 0.932          | 1.762  |

Regression coefficient estimate ± SEE; r<sup>2</sup>, coefficient of determination.; H, height; PhA, phase angle; R, resistance; Xc, reactance; R/H, resistance standardized for height; Xc/H, reactance standardized for height; Subscript RA, LA, WB = right arm, left arm, whole body, respectively. ; \*\*p < 0.001.

**Table 3. Multiple regression analyses for predicting handgrip strength in the dominant, right, and left hands**

| Cumulative dependent variables used in model     |             |              |             |             |              |                 |       |                |      |       |
|--------------------------------------------------|-------------|--------------|-------------|-------------|--------------|-----------------|-------|----------------|------|-------|
| Whole body mode for predicting HGS <sub>DH</sub> |             |              |             |             |              |                 |       |                |      |       |
| Sex                                              | Weight      | Age          | H           | Xc/H        | R/H          | Intercept       | SEE   | r <sup>2</sup> | VIF  | β     |
| 192.16±10.66**                                   | -           | -            | -           | -           | -            | 294.83± 7.55**  | 74.79 | 0.625          | 3.45 | 0.42  |
| 149.40±10.89**                                   | 2.96±0.39** | -            | -           | -           | -            | 114.72± 24.39** | 65.67 | 0.712          | 2.82 | 0.23  |
| 141.01±10.04**                                   | 3.08±0.35** | -1.91±0.30** | -           | -           | -            | 166.37± 23.75** | 60.00 | 0.761          | 1.48 | -0.11 |
| 118.38±11.97**                                   | 2.60±0.37** | -1.55±0.31** | 2.18±0.66** | -           | -            | -165.73±103.70  | 58.53 | 0.774          | 2.66 | 0.22  |
| 126.38±13.79**                                   | 2.82±0.42** | -1.50±0.32** | 2.23±0.66** | 0.78±0.67*  | -            | -232.56±118.42  | 57.47 | 0.784          | 6.69 | 0.29  |
| 102.90±15.06**                                   | 1.95±0.48** | -0.96±0.35** | 2.65±0.66** | 3.42±1.01*  | -0.66±0.19** | 48.70±117.77    | 56.89 | 0.792          | 7.26 | -0.38 |
| Right arm mode for predicting HGS <sub>RH</sub>  |             |              |             |             |              |                 |       |                |      |       |
| 191.68±10.81**                                   | -           | -            | -           | -           | -            | 291.48±7.66**   | 75.82 | 0.617          | 3.49 | 0.40  |
| 150.38±11.19**                                   | 2.86±0.39** | -            | -           | -           | -            | 117.54±25.07**  | 67.51 | 0.698          | 2.49 | 0.18  |
| 141.73±10.31**                                   | 2.98±0.36** | -1.97±0.31** | -           | -           | -            | 170.86±24.39**  | 61.62 | 0.750          | 1.25 | -0.14 |
| 116.69±12.24**                                   | 2.45±0.38** | -1.58±0.32** | 2.41±0.68** | -           | -            | -196.57±106.03  | 59.84 | 0.765          | 2.64 | 0.23  |
| 113.27±15.29**                                   | 2.39±0.41** | -1.57±0.32** | 2.41±0.68** | 0.28±0.74*  | -            | -181.21±113.88  | 59.97 | 0.766          | 5.60 | 0.18  |
| 96.44±15.45**                                    | 1.51±0.46** | -1.22±0.33** | 2.83±0.67** | 2.26±.98*   | -0.94±0.25** | -101.23±112.17  | 58.01 | 0.782          | 7.21 | -0.34 |
| Left arm mode for predicting HGS <sub>LH</sub>   |             |              |             |             |              |                 |       |                |      |       |
| 170.26±12.42**                                   | -           | -            | -           | -           | -            | 267.28±7.10**   | 70.29 | 0.773          | 3.55 | 0.42  |
| 134.51±10.56**                                   | 2.47±0.37** | -            | -           | -           | -            | 116.71±23.64**  | 63.65 | 0.671          | 2.58 | 0.18  |
| 126.66±9.79**                                    | 2.59±0.34** | -1.78±0.29** | -           | -           | -            | 165.05±23.18**  | 58.55 | 0.719          | 1.25 | -0.16 |
| 111.33±.998**                                    | 2.26±0.37** | -1.54±0.32** | 1.48±0.66*  | -           | -            | -59.87±102.26   | 57.95 | 0.730          | 2.71 | 0.18  |
| 109.44±14.69**                                   | 2.23±0.40** | -1.55±0.31** | 1.48±0.66** | -0.15±0.67* | -            | -52.12±108.69   | 58.09 | 0.730          | 4.93 | 0.16  |
| 92.39±15.21**                                    | 1.43±0.46*  | -1.25±0.32** | 1.98±0.66*  | 1.75±0.87*  | -0.76±0.23** | -102.47±107.26  | 56.67 | 0.745          | 6.76 | -0.31 |

Regression coefficient estimate ± SEE; r<sup>2</sup>, coefficient of determination; H, height;

β, standardized coefficient; B, unstandardized coefficients; VIF, variance inflation factor; SEE, standard error of estimate.

Using all 6 variables, the determination coefficients were 0.792, 0.782, and 0.745, respectively, whereas the standard error of estimates were 56.89, 58.01, and 56.67 N for the dominant, right, and left arms, respectively.; \*\*p < 0.001.

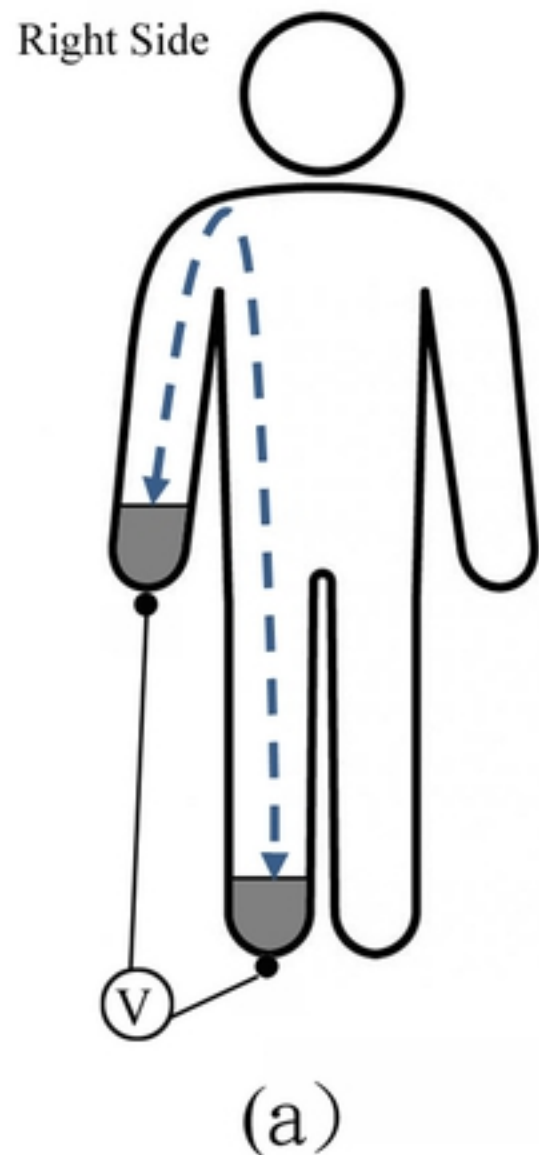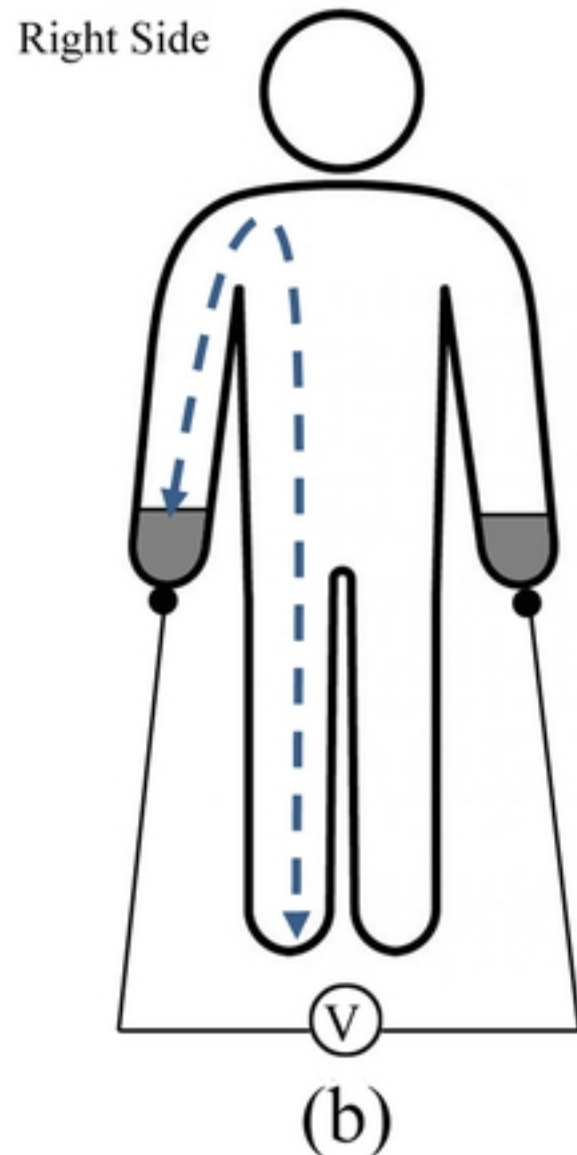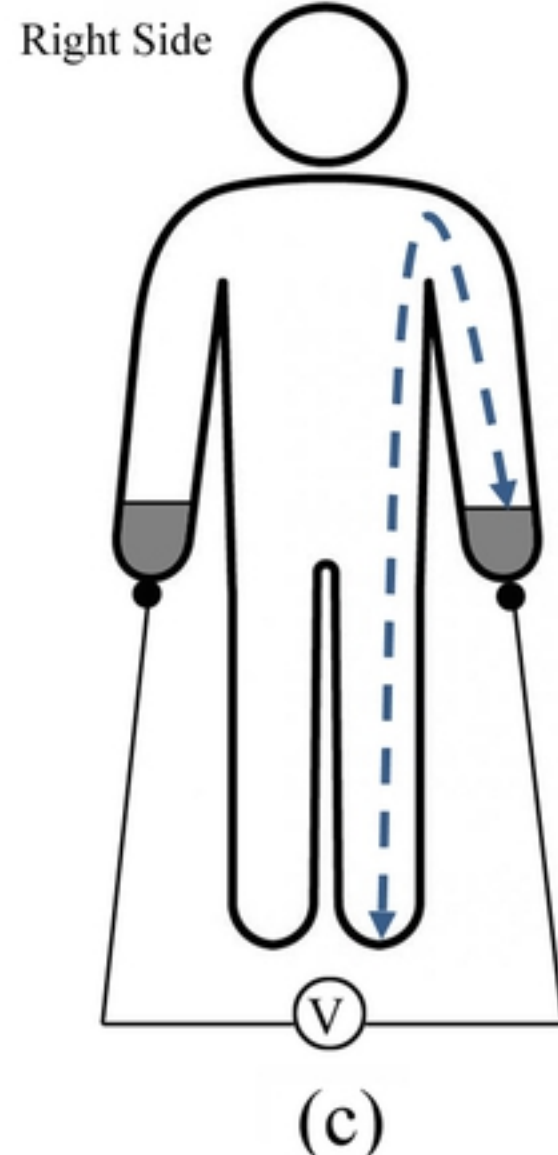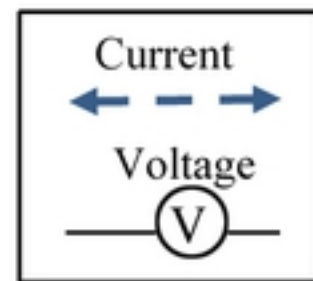

Figure

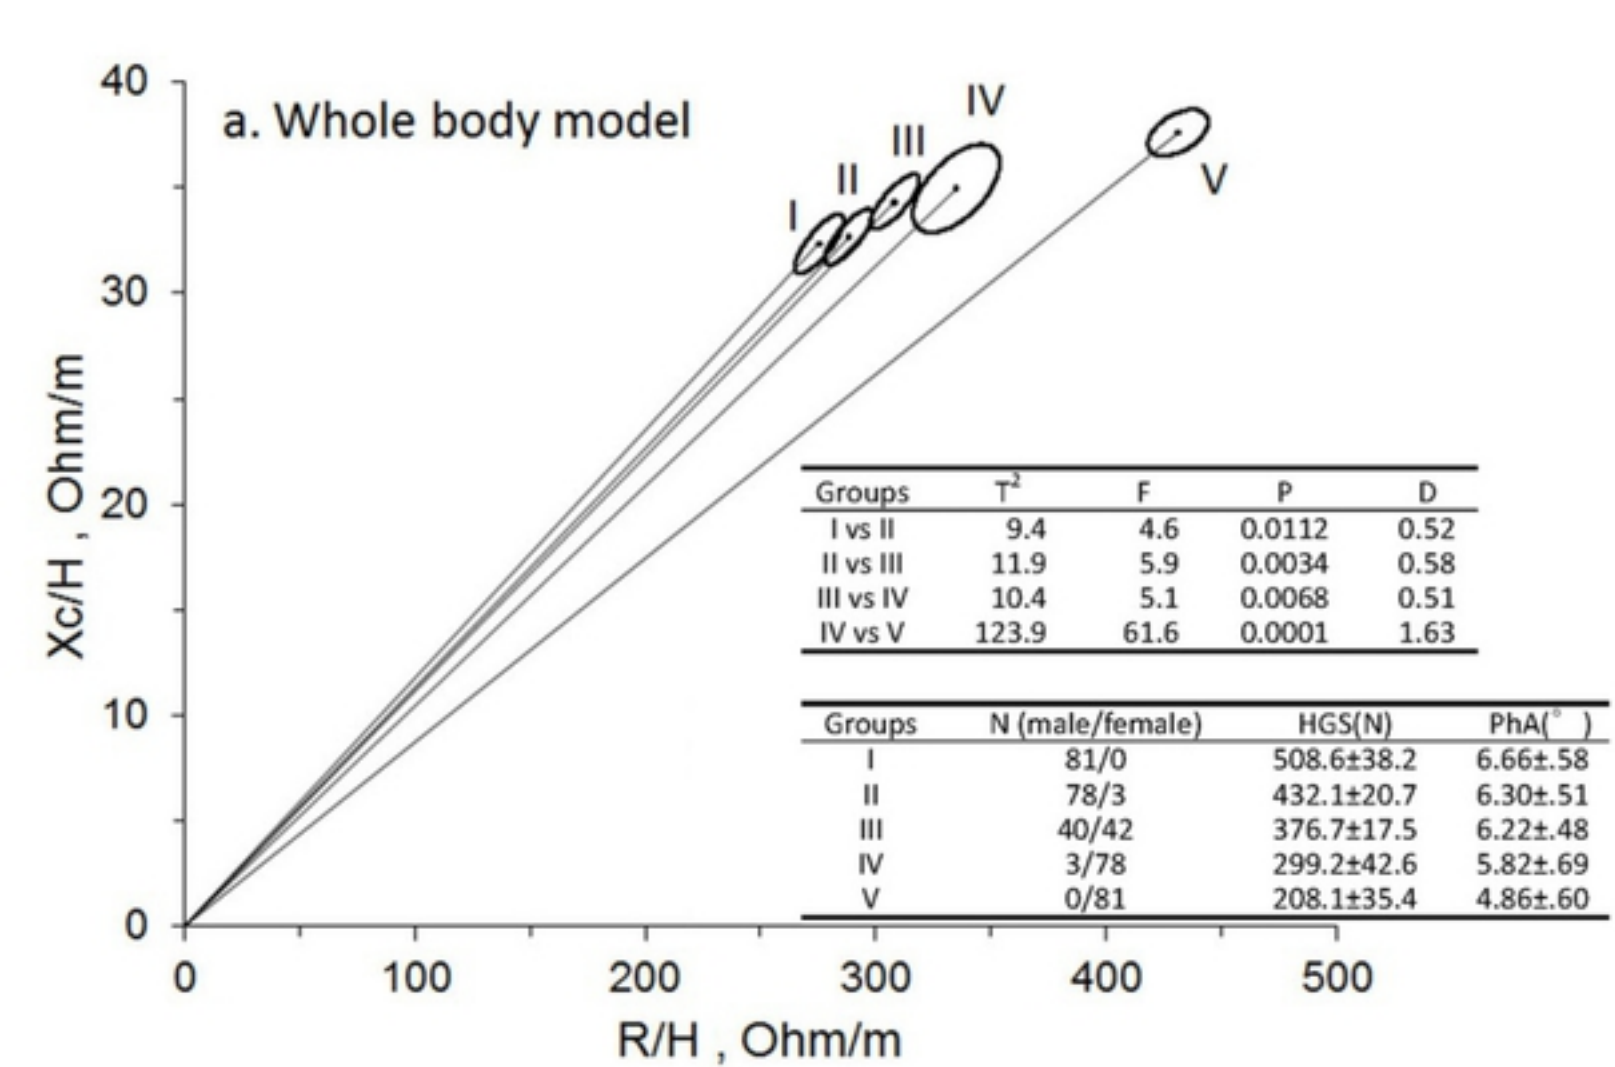

bioRxiv preprint doi: <https://doi.org/10.1101/2020.03.30.016196>; this version posted March 30, 2020. The copyright holder for this preprint (which was not certified by peer review) is the author/funder, who has granted bioRxiv a license to display the preprint in perpetuity. It is made available under aCC-BY 4.0 International license.

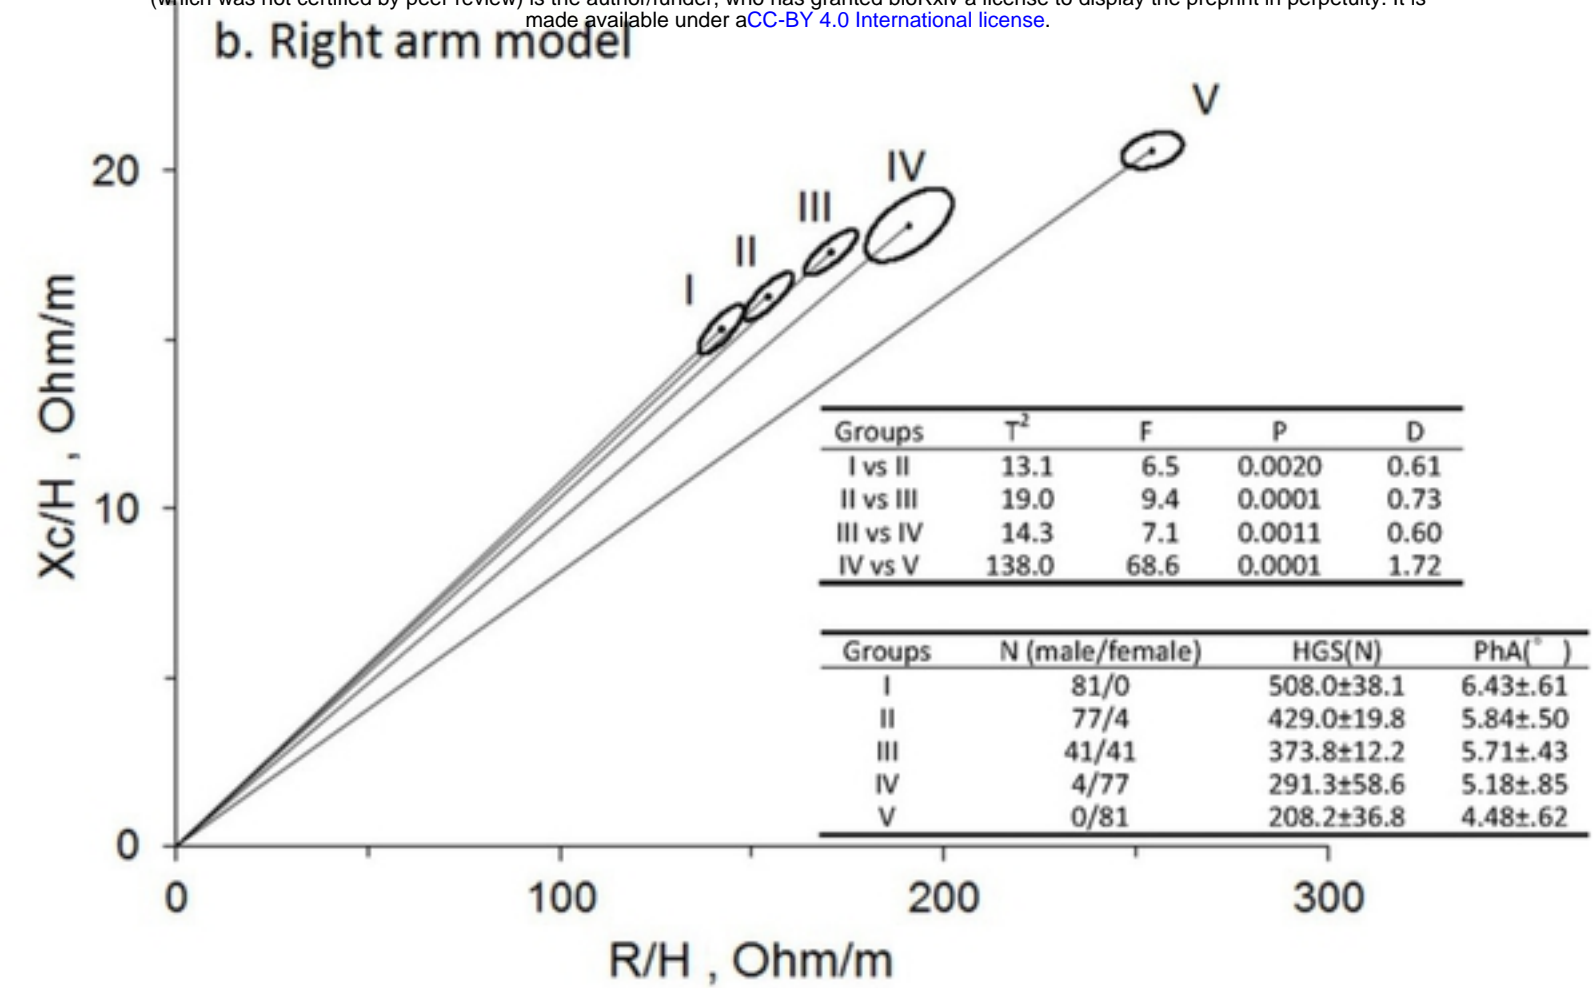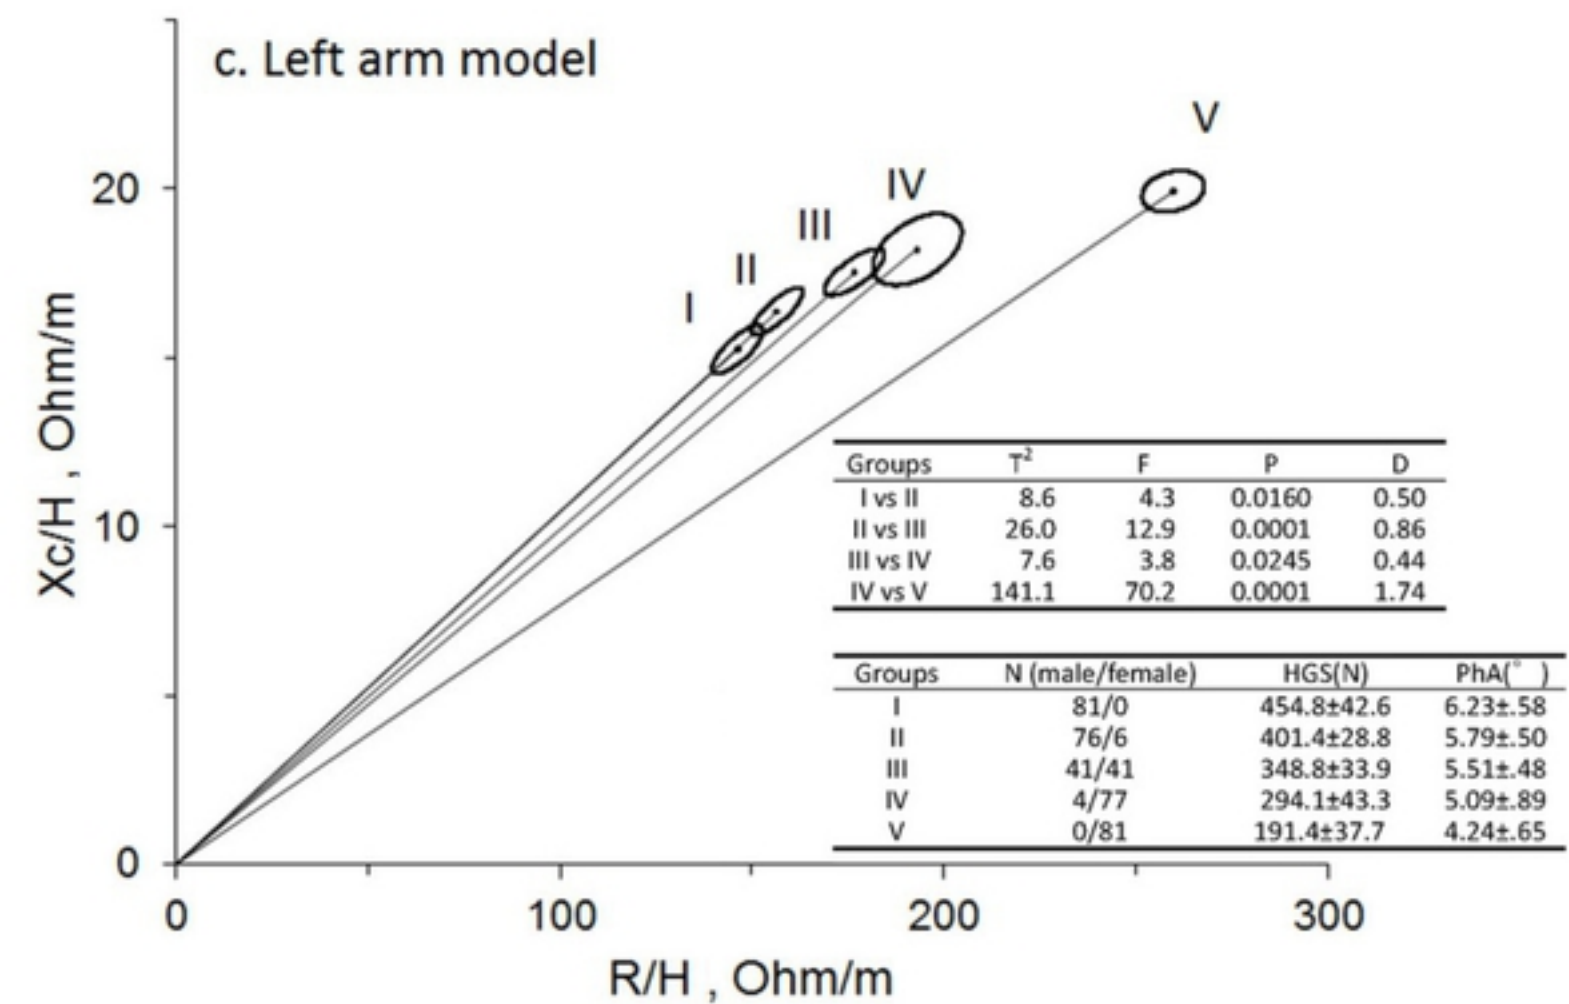

Figure
